# Supplementary material for: Development of drug-induced gastrointestinal injury models based on ANN and SVM algorithms and their applications in the field of natural products
Source: Royal Society of Chemistry journal article supplement (doi:10.1039/d4nj02680b), 2024-01-01
Supplement: d4nj02680b3.pdf [file d4nj02680b3.pdf]

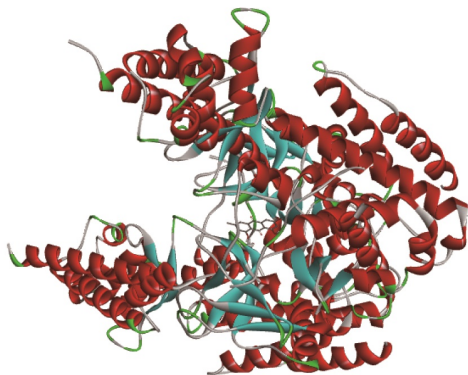

(a) 3D interaction structure of emodin with ACTG2

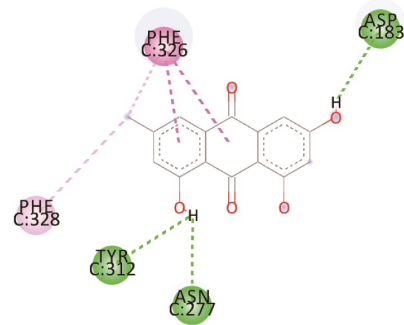

(b) 2D interaction plane diagram of emodin with ACTG2

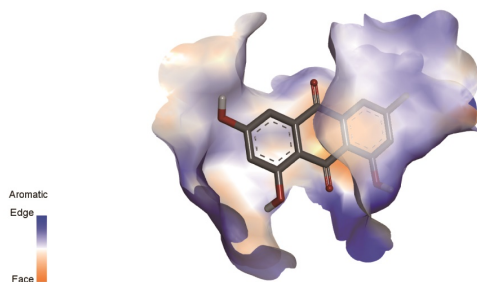

(c) Aromatic interactions between emodin and ACTG2

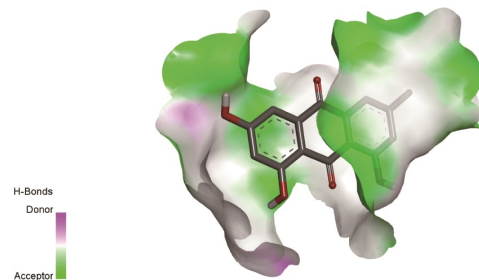

(d) Hydrogen bonding interactions between emodin and ACTG2
