# Supplementary material for: Development of drug-induced gastrointestinal injury models based on ANN and SVM algorithms and their applications in the field of natural products
Source: Royal Society of Chemistry journal article supplement (doi:10.1039/d4nj02680b), 2024-01-01
Supplement: d4nj02680b4.pdf [file d4nj02680b4.pdf]

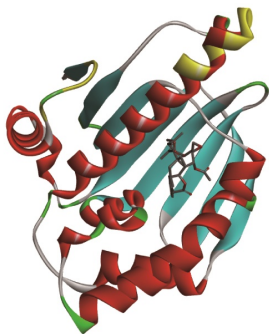

(a) 3D interaction structure of euphobiasteroid with HSP90AA1

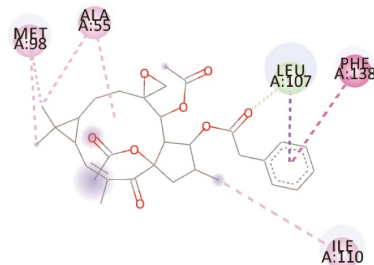

(b) 2D interaction plane diagram of euphobiasteroid with HSP90AA1

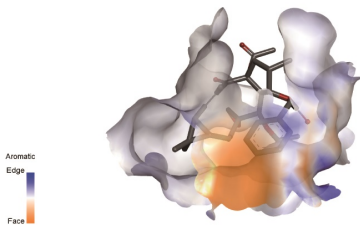

(c) Aromatic interactions between euphobiasteroid and HSP90AA1

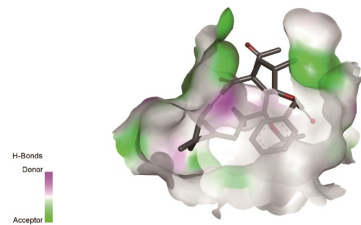

(d) Hydrogen bonding interactions between euphobiasteroid and HSP90AA1
