# Supplementary material for: Development of drug-induced gastrointestinal injury models based on ANN and SVM algorithms and their applications in the field of natural products
Source: Royal Society of Chemistry journal article supplement (doi:10.1039/d4nj02680b), 2024-01-01
Supplement: d4nj02680b5.pdf [file d4nj02680b5.pdf]

## Development of drug-induced gastrointestinal injury models based on ANN and SVM algorithms and its applications in the field of Natural Products

Wenqing Zhang<sup>#</sup>, Mengjiao Zhou<sup>#</sup>, Xingxu Yan, Siyu Chen, Wenxiu Qian, Yue Zhang, Xinyue Zhang, Guoxiang Jia, Shan Zhao, Yaqi Yao\* and Yubo Li\*

<sup>#</sup>These authors contributed equally to this work and should be considered co-first authors

\*Correspondence: Yaqi Yao and Yubo li

E-mail address: yaopharmacy@163.com (Yaqi Yao); yaowufenxi001@sina.com (Yubo Li).

Tel and Fax number: +86-022-59591974

School of Chinese Materia Medica, Tianjin University of Traditional Chinese Medicine, Tianjin 301617, China

Tianjin Key Laboratory of Therapeutic Substance of Traditional Chinese Medicine, Tianjin 301617, China

Table S1. Screening of DIGI components of natural products based on ANN model

| herbs           | components       | Compound structure                                                                    |
|-----------------|------------------|---------------------------------------------------------------------------------------|
|                 | Protoveratrine A | 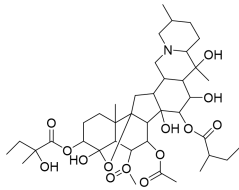 |
| Veratrum nigrum | Veratrosine      |  |
|                 | Veratramine      |  |

| herbs                          | components            | Compound structure                                                                    |
|--------------------------------|-----------------------|---------------------------------------------------------------------------------------|
|                                | Cyclopamine           | 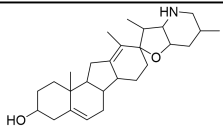   |
|                                | Veratrine             |    |
|                                | Veratridine           |    |
|                                | Germerine             |    |
|                                | Neogermbudine         |   |
| Xanthii Fructus                | Atractyloside         |  |
|                                | Carboxyatractyloside  |  |
| Ginkgo Semen                   | Ginkgolic acid        |   |
|                                | 4'-O-Methylpyridoxine |  |
| Radix Sophorae<br>Flavescentis | Kurarinone            |  |

| herbs                     | components        | Compound structure                                                                    |
|---------------------------|-------------------|---------------------------------------------------------------------------------------|
| Psoraleae Fructus         | Psoralenoside     | 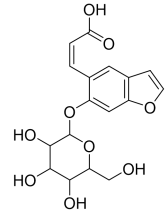   |
|                           | Isopsoralenoside  |    |
|                           | Jacoline          |    |
| Scandentis Hebra          | Jacobine          |   |
|                           | Adonifoline       |  |
|                           | Phytolaccae Radix | Esculentoside A                                                                       |
| Esculentoside B           |                   |  |
| Esculentoside C           |                   |  |
| Polygoni Multiflori Radix | Gallic acid       |  |

| herbs                                                 | components                          | Compound structure                                                                    |
|-------------------------------------------------------|-------------------------------------|---------------------------------------------------------------------------------------|
|                                                       | Emodin- 8- O- glucoside             | 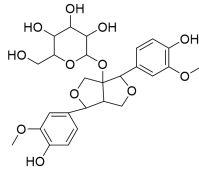   |
|                                                       | Emodin-8-O- β<br>-D-glucopyranoside |    |
| Rhei radix et<br>rhizoma、Polygoni<br>Multiflori Radix | Chrysophanol                        |    |
|                                                       | Physcion                            |    |
|                                                       | Rhein                               |    |
| Sannae Folium                                         | Sennoside A                         |  |
|                                                       | Sennoside B                         |  |
| Kansui Radix                                          | Kansuiphorin A                      |   |
|                                                       | Kansuiphorin B                      |   |
| Herb Of Common<br>Peganum                             | Harmine                             |  |

| herbs                                                               | components      | Compound structure                                                                    |
|---------------------------------------------------------------------|-----------------|---------------------------------------------------------------------------------------|
|                                                                     | Harmaline       | 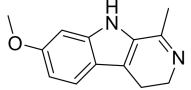   |
| Gamboge                                                             | Gambogic acid   |    |
|                                                                     | Gambogenic acid |    |
| Catharanthus<br>roseus L.                                           | Vinblastine     |    |
|                                                                     | Vinorelbine     |   |
| Andrographis<br>Herba                                               | Andrographolide |  |
| Toosendan Fructus                                                   | Trichilin D     |  |
| Aconiti Lateralis<br>Radix Praeparata、<br>Aconiti Radix、<br>Aconiti | Mesaconitine    |  |

| herbs                                                   | components         | Compound structure                                                                    |
|---------------------------------------------------------|--------------------|---------------------------------------------------------------------------------------|
| Kusnezoffii Radix、<br>Aconitum<br>brachypodum Diels     | Hypaconitine       | 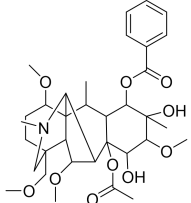   |
| Aconiti Lateralis<br>Radix Praeparata、<br>Aconiti Radix | Benzoylmesaconine  |    |
|                                                         | Benzoylhypacoitine |    |
| Pseudolaricis<br>Cortex                                 | Pseudolaric acid A |   |
|                                                         | Pseudolaric acid B |  |
| Chinese Coriaria                                        | Coriamyrtin        |  |
|                                                         | Tutin              |  |
| Dioscorea<br>bulbifera                                  | Diosbulbin A       |  |
|                                                         | Diosbulbin C       |  |

| herbs                                                                                     | components        | Compound structure                                                                    |
|-------------------------------------------------------------------------------------------|-------------------|---------------------------------------------------------------------------------------|
| Glycyrrhizae Radix<br>Rhizoma                                                             | Glycyrrhizic acid | 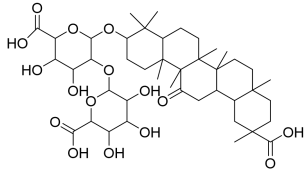   |
|                                                                                           | glycyrrhetic acid |    |
| Plumbago<br>zeylanicaL.                                                                   | Plumbagin         |    |
| Aloe、Rhei radix et<br>rhizoma、                                                            | Aloe-emodin       |    |
| Polygoni Multiflori<br>Radix                                                              |                   |                                                                                       |
| Rhei radix et<br>rhizoma、 Polygoni<br>Multiflori Radix 、<br>Genkwa Flos 、<br>Kansui Radix | Emodin            |  |
| Artemisiae Argyi<br>Folium 、 Herba                                                        | D-camphor         |  |
| Asari Forbesii                                                                            |                   |                                                                                       |
| Albiziae Cortex                                                                           | Julibrine II      |  |
| Artemisiae Argyi<br>Folium                                                                | $\alpha$ -thujone |  |

| herbs                                           | components                        | Compound structure                                                                    |
|-------------------------------------------------|-----------------------------------|---------------------------------------------------------------------------------------|
| Picrasmae ramulus<br>et folium                  | 4-methoxy-5-hydroxy-canthin-6-one | 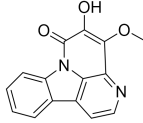   |
| Farfarae Flos                                   | Retrorsine                        |    |
| Castor bean                                     | Ricinine                          |    |
| Tripterygium<br>Hypoglaucum                     | Wilforine                         |    |
| Farfarae Flos<br>Gynura Segetum<br>Senecionis   | Senecionine                       |   |
| Scandentis Hebra<br>Common<br>Threewingnut Root | Celastrol                         |  |
| Sophorae<br>Tonkinensis Radix<br>et Rhizoma     | Sophoranone                       |  |
| Verbenae Herba                                  | Lycopsamine                       |  |
| Sinomenii Caulis                                | Sinomenine                        |  |
| Komarov<br>Swallowwort                          | 2,2,6,6-tetramethyl-4-piperidone  |  |



| herbs                                           | components                   | Compound structure                                                                    |
|-------------------------------------------------|------------------------------|---------------------------------------------------------------------------------------|
| Seeds Of<br>Pachyrhizus Erosus                  | 12 $\alpha$ -hydroxyrotenone | 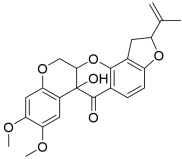   |
| Aconitum<br>brachypodum Diels                   | 3-acetylaconitine            |    |
| Cycas Seed                                      | Cycasin                      |    |
| Gynura Segetum                                  | Integerrimine                |    |
| Tripterygium<br>Hypoglaucomum<br>Common         | Triptolide                   |   |
| Threewingnut Root<br>Rhododendri<br>mollis flos | Rhodojaponin II              |  |
| Jatropha curcas                                 | Phorbol ester                |   |
| Bulbus Lycoridis<br>Radiatae                    | Lycorine                     |  |
| Quisqualis Fructus                              | Quisqualic acid              |  |
| Herba Epimedii                                  | Epimedin C                   |  |

| herbs                                                                                | components    | Compound structure                                                                    |
|--------------------------------------------------------------------------------------|---------------|---------------------------------------------------------------------------------------|
| Gardeniae Fructus                                                                    | Geniposide    | 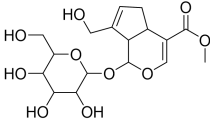   |
| Farfarae Flos 、<br>Senecionis<br>Scandentis Hebra                                    | Senkirkine    |    |
| Herba Crotalariae、<br>Stem and Leaf of<br>Assam Crotalaria                           | Monocrotaline |    |
| Genkwa Flos                                                                          | Yuanhuacin    |    |
| Frucus Bruceae                                                                       | Brusatol      |   |
| Opium 、 Papaveris<br>Pericarpium                                                     | Morphine      |  |
| Daturaeflos 、<br>Physochlainae<br>Radix 、 Datura<br>Seed 、 Folium<br>Daturae Metelis | Scopolamine   |  |
| Daturaeflos 、<br>Physochlainae<br>Radix、 Hyoscyami                                   | Hyoscyamine   |  |
| Semen 、 Datura<br>Seed 、 Folium<br>Daturae Metelis                                   | Atropine      |  |

| herbs                                                                                                                                                                                                                                                                                 | components          | Compound structure                                                                    |
|---------------------------------------------------------------------------------------------------------------------------------------------------------------------------------------------------------------------------------------------------------------------------------------|---------------------|---------------------------------------------------------------------------------------|
| Wooly<br>Datchmanspipe<br>Herb 、 Radix<br>Aristolochiae<br>Cinnabarinae 、<br>Herba Asari<br>Forbesii 、 Caulis<br>aristolochiae<br>manshuriensis 、<br>Radix<br>Aristolochiae<br>Fangchi 、 Radix<br>Aristolochiae 、<br>Aristolo - chia<br>fordiana Hemsl. 、<br>Fructus<br>Aristolochiae | Aristolochic acid A | 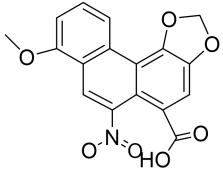   |
| Gynura Segetum、<br>Senecionis<br>Scandentis Hebra                                                                                                                                                                                                                                     | Seneciophylline     |  |
| Aconitum<br>Vilmorinianum<br>Kom. 、 Aconitum<br>brachypodum<br>Diels 、 Aconitum<br>vilmorinianum                                                                                                                                                                                      | Yunaconitine        |  |



| herbs                                                                                                 | components                       | Compound structure                                                                    |
|-------------------------------------------------------------------------------------------------------|----------------------------------|---------------------------------------------------------------------------------------|
| Sinopodophyllum<br>hexandrum<br>Dysosma<br>versipellis<br>Sinopodophylli<br>Fructus<br>Radix bupleuri | Podophyllotoxin                  | 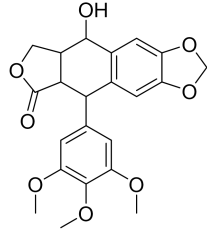   |
|                                                                                                       | Saikosaponin A                   |     |
|                                                                                                       | Saikosaponin D                   |    |
| Fallopia multiflora                                                                                   | Physcion-8-O-β-D-glucopyranoside |  |
| Euphorbia lathyris<br>L.                                                                              | Euphorbia steroid                |  |
| Veratrum viride                                                                                       | Germine                          |  |
|                                                                                                       | Physcion-8-O-glucoside           |  |
| Chelidonium<br>majus .L                                                                               | Chelidoneine                     |  |

| herbs                        | components  | Compound structure                                                                  |
|------------------------------|-------------|-------------------------------------------------------------------------------------|
| Anabasis aphylla             | Anabasine   | 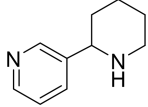 |
| Fourstamen<br>Stephania Root | Tetrandrine |  |
| Gelsmium elegans             | Koumine     |  |
| Icarine                      | Icariin     |  |

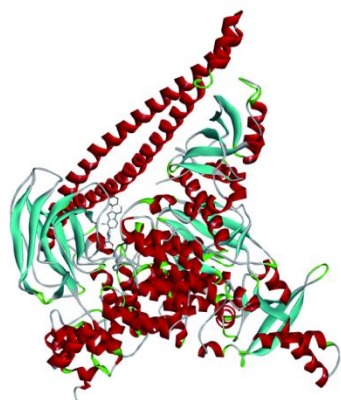

(a) 3D interaction structure of Veratramine with PIK3CA

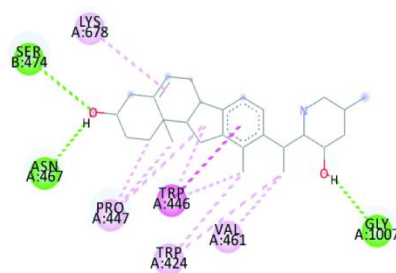

(b) 2D interaction plane diagram of Veratramine with PIK3CA

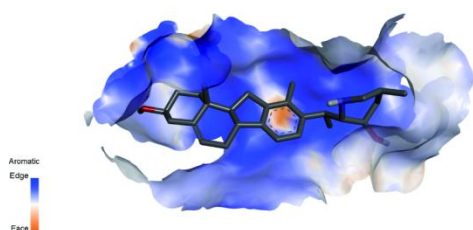

(c) Aromatic interactions between Veratramine and PIK3CA

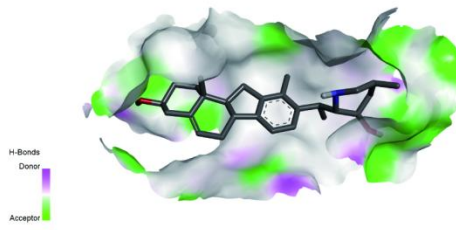

(d) Hydrogen bonding interactions between Veratramine and PIK3CA

Figure S1. Docking results of Veratramine and PIK3CA molecule. Veratramine was semi-flexibly docked with the protein receptor PIK3CA. From the 2D interaction diagrams, it can be observed that the interacting amino acid residues primarily include ASN467, GLY1007, TRP446, PRO447, TRP424, VAL461, and LYS678. Among them, the oxygen atoms in the Veratramine structure form stable hydrogen bonds with ASN467 and GLY1007. The TRP446 residue engages in Pi-Pi interactions with the benzene ring of Veratramine. Furthermore, the ligand molecule forms Pi-Alkyl interactions with the PRO447, TRP424, and VAL461 residues.

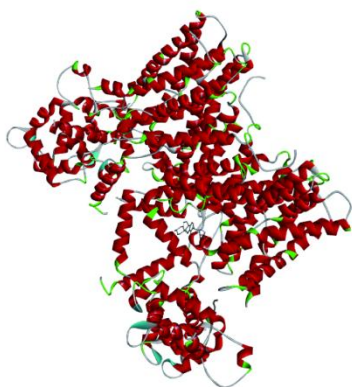

(a) 3D interaction structure of Veratramine with SLC9A3

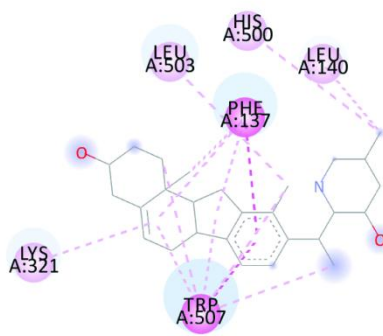

(b) 2D interaction plane diagram of Veratramine with SLC9A3

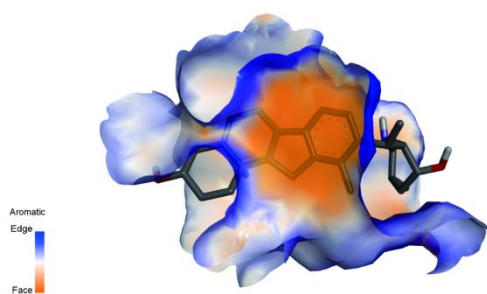

(c) Aromatic interactions between Veratramine and SLC9A3

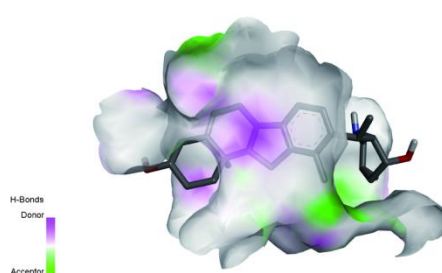

(d) Hydrogen bonding interactions between Veratramine and SLC9A3

Figure S2. Docking results of Veratramine and SLC9A3 molecule. Veratramine was semi-flexibly docked with the protein receptor SLC9A3. From the 2D interaction diagram, it can be seen that the interacting amino acid residues primarily include TRP507, PHE137, LYS321, LEU140, LEU503, and HIS500. The TRP507 and PHE137 residues engage in Pi-Pi interactions with the benzene ring of Veratramine. Additionally, the ligand molecule forms Pi-Alkyl interactions with the LYS321, LEU140, LEU503, and HIS500 residues.



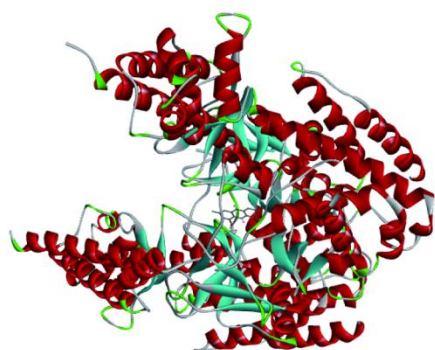

(a) 3D interaction structure of emodin with ACTG2

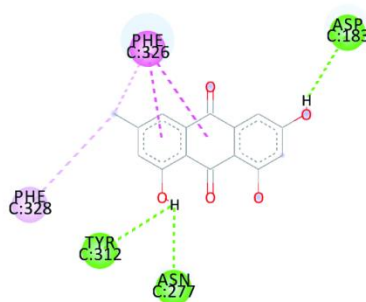

(b) 2D interaction plane diagram of emodin with ACTG2

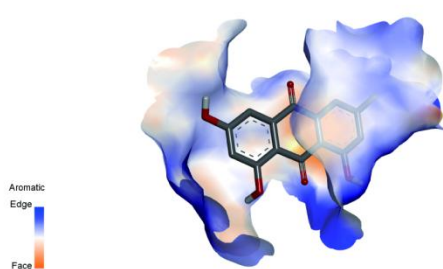

(c) Aromatic interactions between emodin and ACTG2

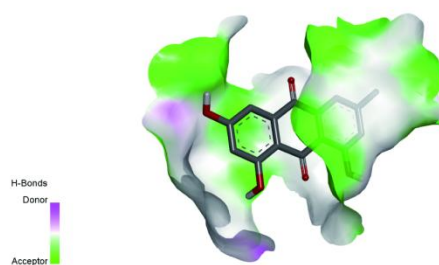

(d) Hydrogen bonding interactions between emodin and ACTG2

Figure S3. Docking results of emodin and ACTG2 molecule. Emodin was semi-flexibly docked with the protein receptor ACTG2. From the 2D interaction diagram, it can be observed that the interacting amino acid residues primarily include TYR312, ASN277, ASP183, PHE326, and PHE328. The TYR312, ASN277, and ASP183 residues form hydrogen bonds with the hydrogen atoms in the structure of emodin. The PHE326 residue engages in Pi-Pi interactions with the ligand molecule. Additionally, the ligand molecule forms Pi-Alkyl interactions with the PHE328 residue.

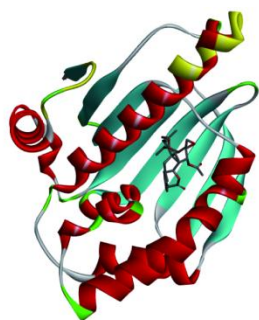

(a) 3D interaction structure of euphobiasteroid with HSP90AA1

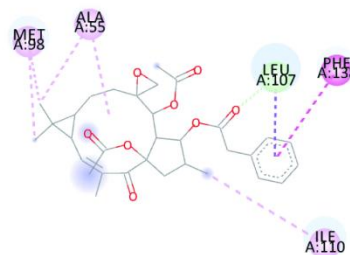

(b) 2D interaction plane diagram of euphobiasteroid with HSP90AA1

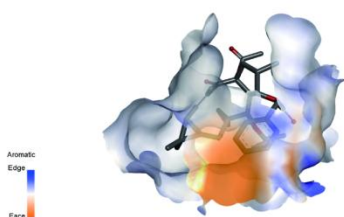

(c) Aromatic interactions between euphobiasteroid and HSP90AA1

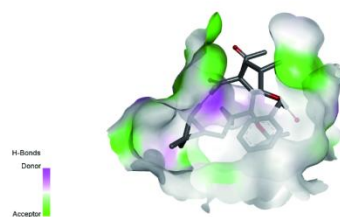

(d) Hydrogen bonding interactions between euphobiasteroid and HSP90AA1

Figure S4. Docking results of euphobiasteroid and HSP90AA1 molecule. Euphobiasteroid was semi-flexibly docked with the protein receptor HSP90AA1. From the 2D interaction diagram, it can be observed that the interacting amino acid residues primarily include LEU107, PHE138, MET98, ALA55, and ILE110. The oxygen atom in the structure of euphobiasteroid forms a stable hydrogen bond with LEU107. The PHE138 residue engages in Pi-Pi interactions with the benzene ring of euphobiasteroid. Additionally, the ligand molecule forms Alkyl interactions with the MET98, ALA55, and ILE110 residues.
